# Supplementary material for: Structural basis of norepinephrine recognition and transport inhibition in neurotransmitter transporters
Source: Springer Nature journal article supplement (doi:10.1038/s41467-021-22385-9), 2021-04-13
Supplement: MOESM1 [file 41467_2021_22385_MOESM1_ESM.pdf]

## Supplementary Information

### **Structural basis of norepinephrine recognition and transport inhibition in neurotransmitter transporters**

Shabareesh Pidathala<sup>1</sup>, Aditya Kumar Mallela<sup>1</sup>, Deepthi Joseph<sup>1</sup> and Aravind Penmatsa<sup>1,\*</sup>

<sup>1</sup>Molecular Biophysics Unit, Indian Institute of Science, CV Raman Road, Bangalore 560012.

Running Head. Norepinephrine and inhibitor recognition in neurotransmitter transporters

\*Corresponding author. Correspondence and requests for material may be addressed to AP (Email. [penmatsa@iisc.ac.in](mailto:penmatsa@iisc.ac.in); Phone. +91-8022932458)

Supplementary Figures 1-8  
Supplementary Tables 1-3

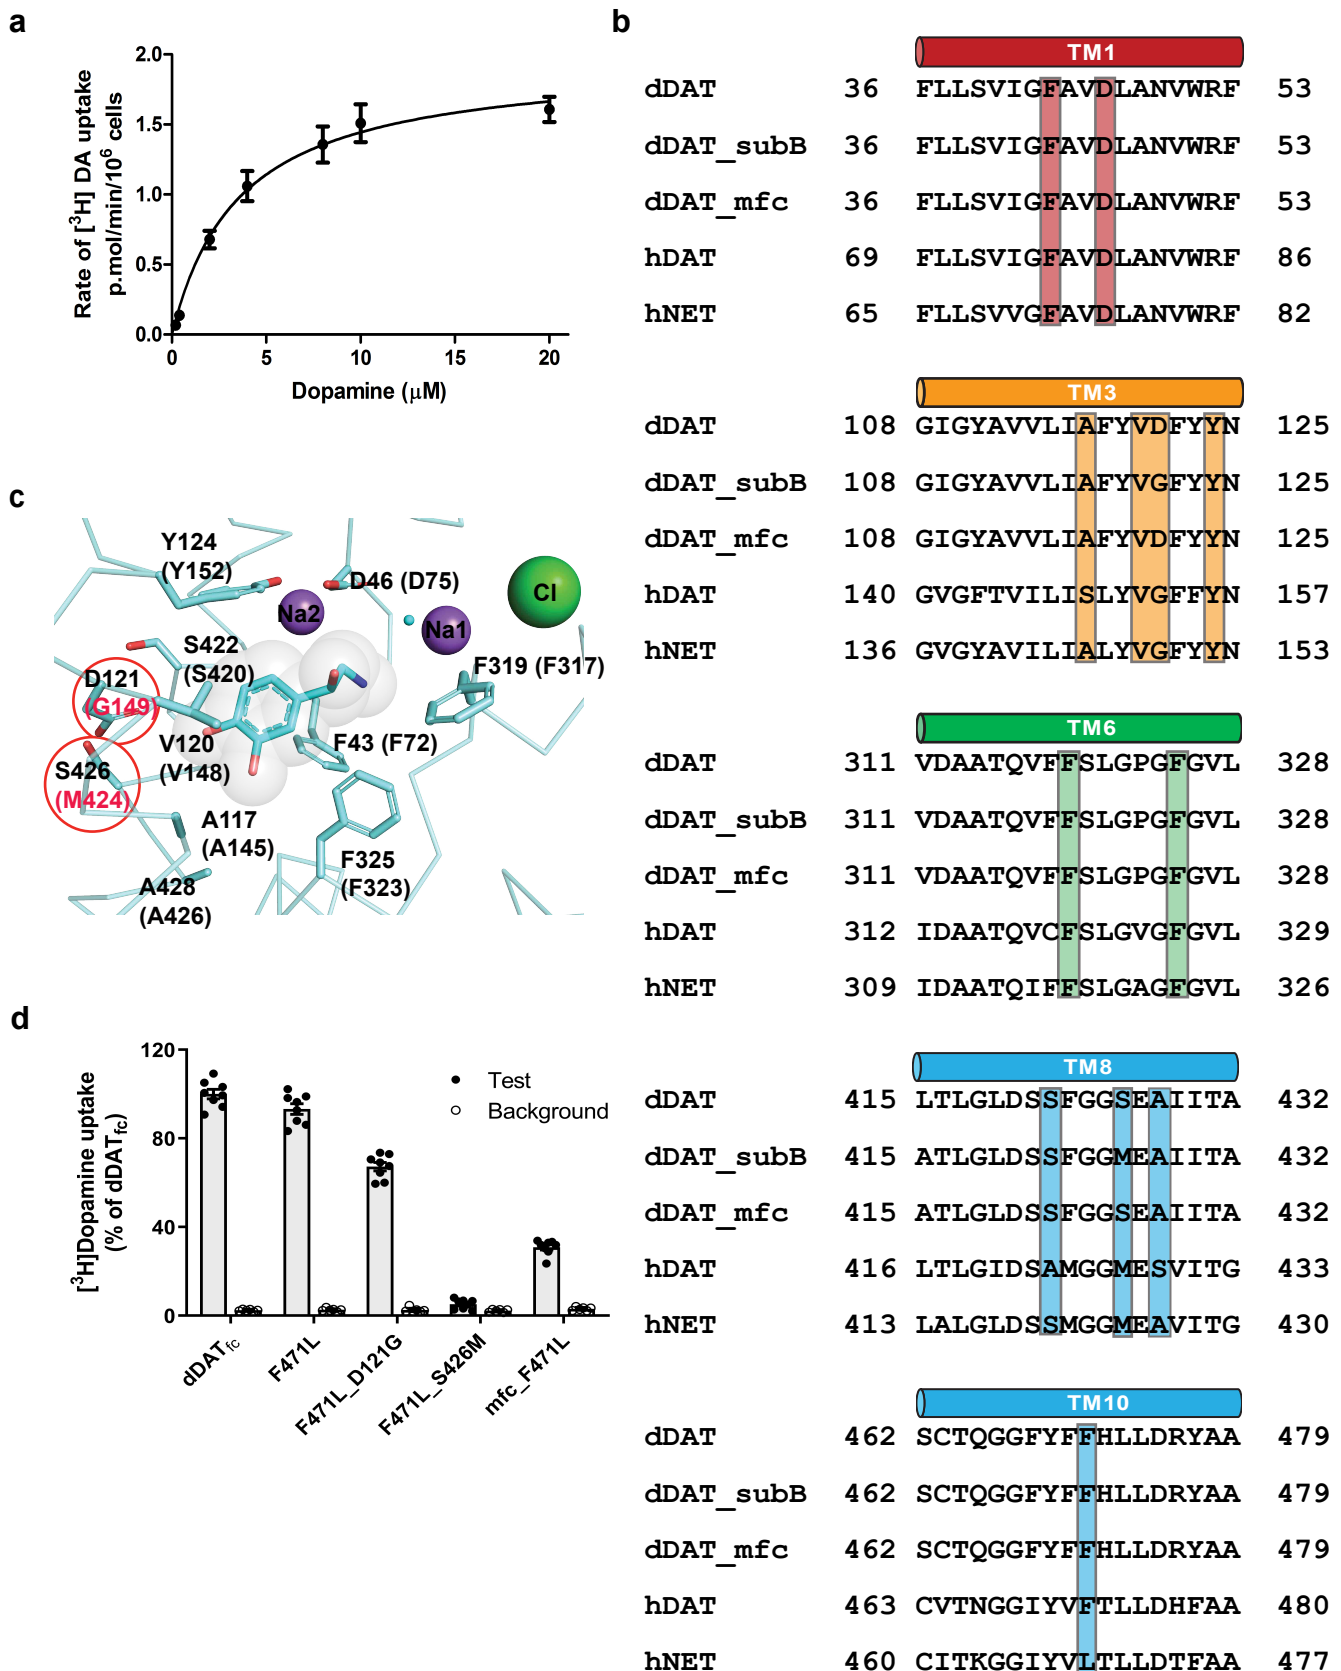

**Supplementary Fig. 1. a**, [ $^3\text{H}$ ] Dopamine uptake kinetics of dDAT functional construct with F471L mutation. The plot is an average of  $n = 6$  measurements obtained over 2 independent experiments with error bars representing s.e.m.  $K_M$  value measured was  $3.6 \pm 0.8 \mu\text{M}$ . **b**, Multiple sequence alignment of the helices surrounding the primary substrate/inhibitor binding site with residues that sculpt the binding pocket highlighted as vertical bars. **c**, Binding site residues and subsite B mutants performed in the study represented in the structure with bound L-norepinephrine. The corresponding amino-acids of hNET are indicated in parenthesis. **d**, [ $^3\text{H}$ ] Dopamine uptake analysis using subsite B mutants D121G and S426M in the context of F471L mutant. S426M causes a loss of transport activity. The plot is an average of  $n = 8$  measurements obtained over 3 independent experiments with error bars representing s.e.m. Source data are provided as a Source Data file.

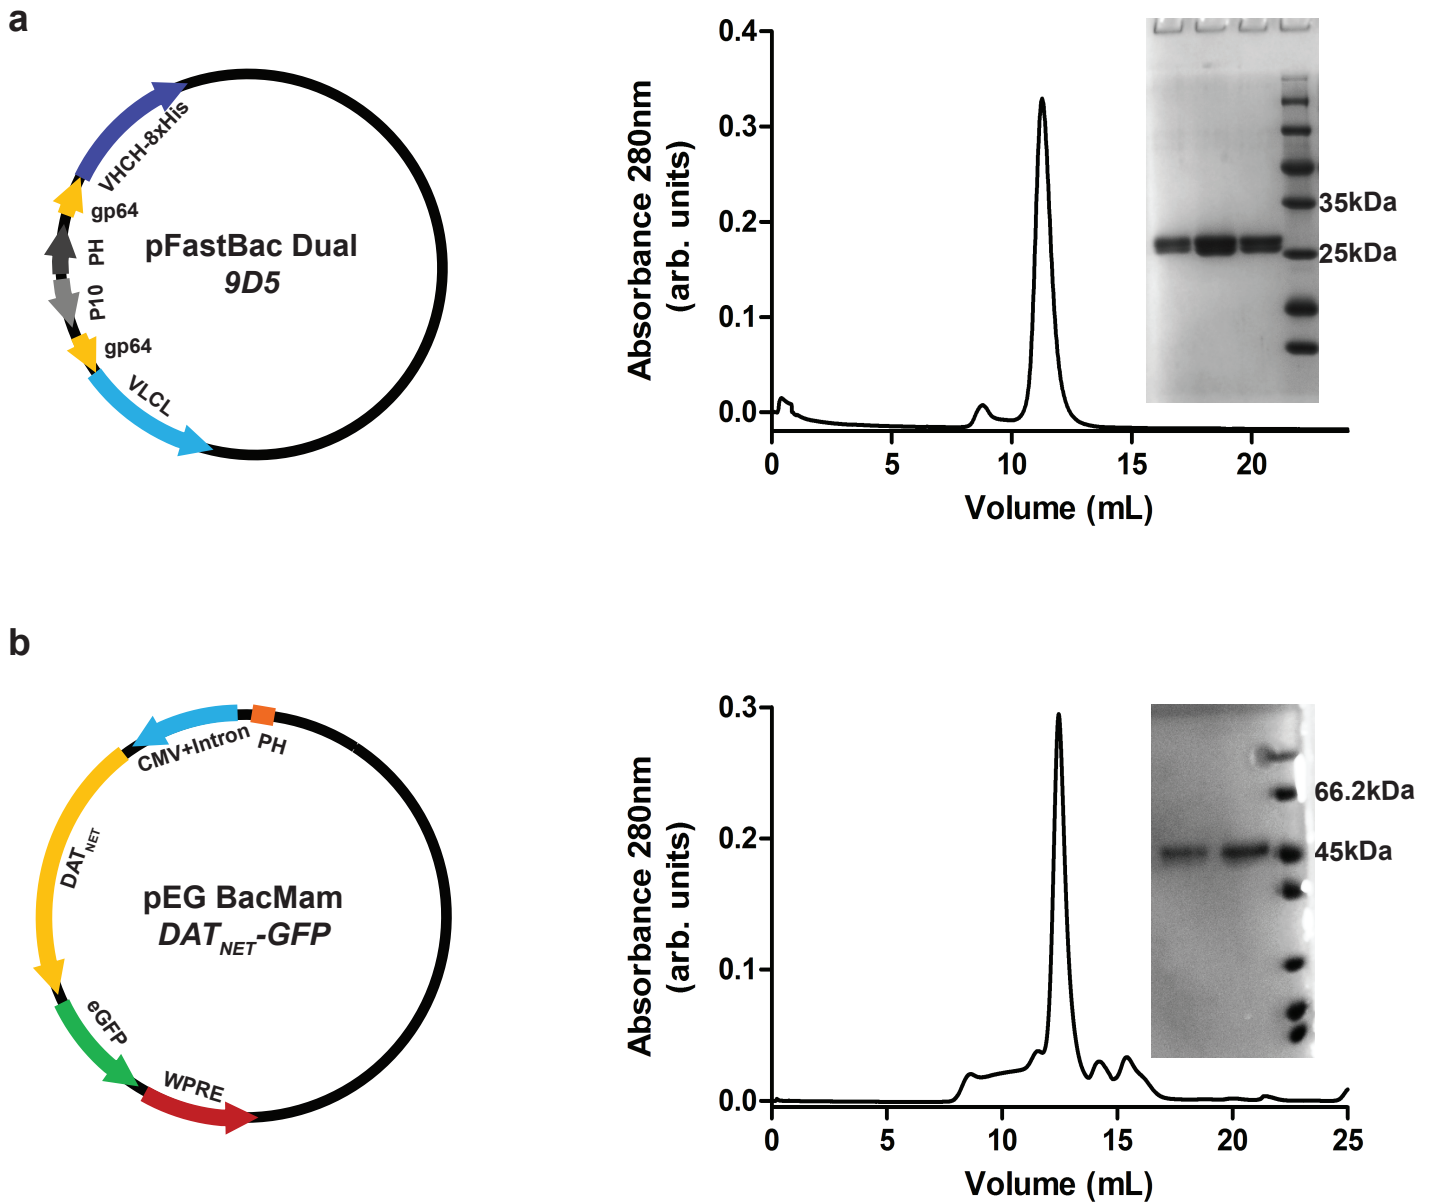

**Supplementary Fig. 2. a**, Vector design of pFastBac dual containing the heavy and light chains of the 9D5 antibody fragment cloned downstream of the polyhedrin (PH) and p10 promoters, respectively. Both genes were cloned with a gp64 signal peptide at the N-terminus to facilitate export from insect cells. Panel on the right shows a representative size exclusion chromatogram of the purified Fab and inset displays heavy and light chain bands for the purified 9D5 with coomassie stained SDS-PAGE (12%). The protein purification was repeated 20 times with consistent results. **b**, Vector design of the dDAT constructs in pEG BacMam with a C-terminal GFP that was cleaved by thrombin cleavage post-expression. Panel on right shows a representative chromatogram of purified dDAT and the corresponding protein band stained with coomassie on an SDS-PAGE (12%). The protein purification was repeated 20 times with consistent results.

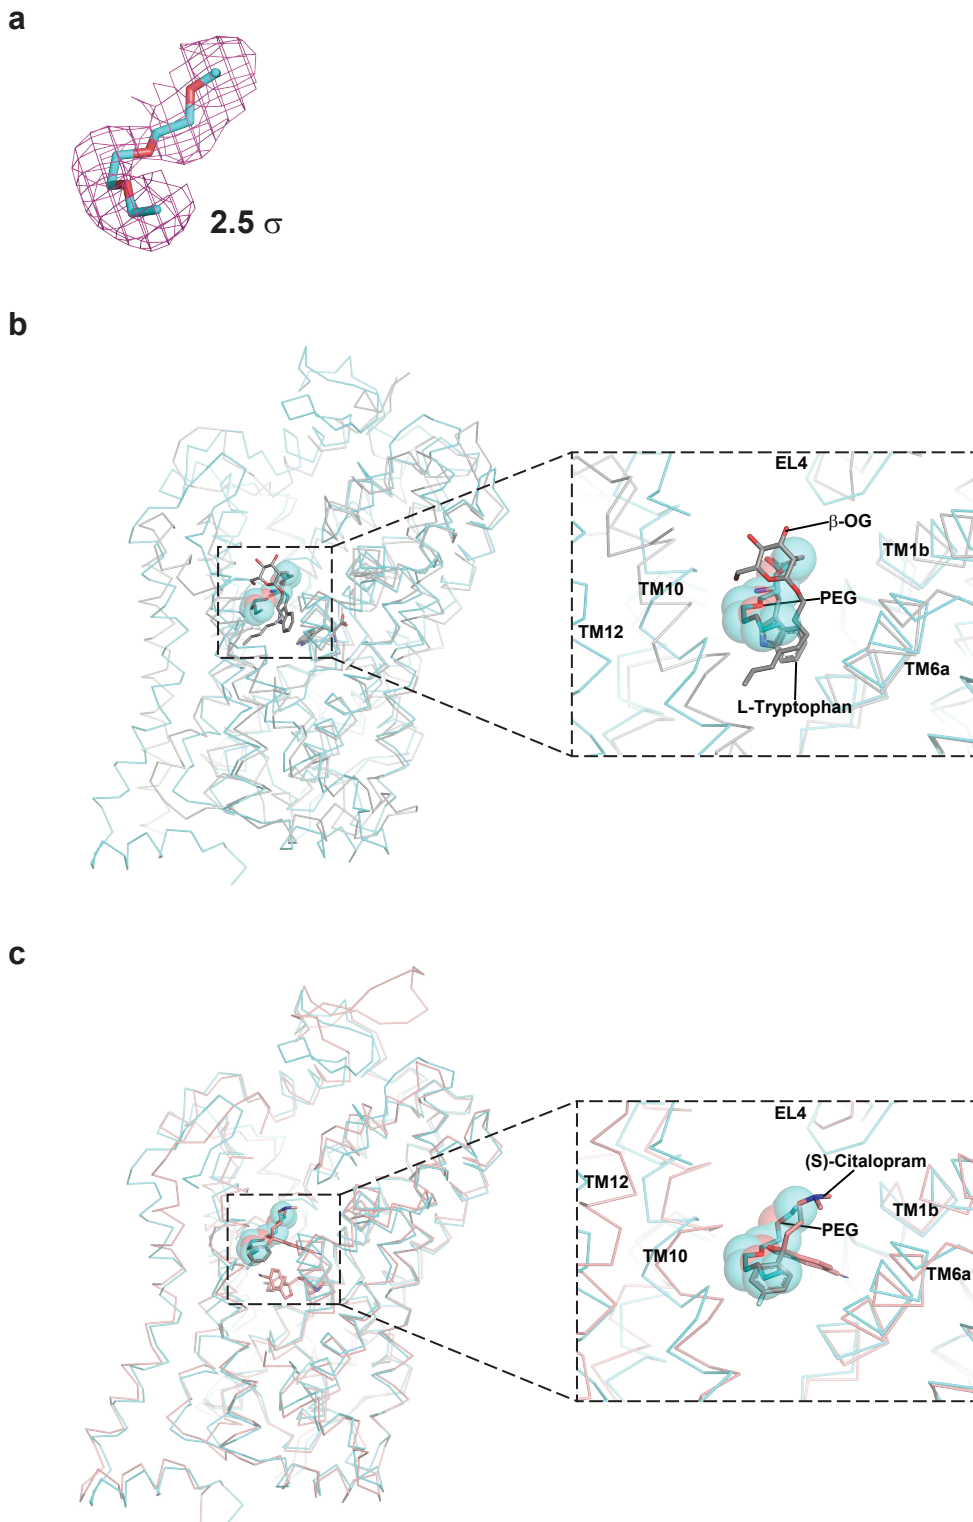

**Supplementary Fig. 3. a**, The *Fo-Fc* map of PEG ( $2.5 \sigma$ ) observed in the secondary binding site of  $dDAT_{\text{subB}}$  in its substrate free state (apo). **b**, Overlay of  $dDAT_{\text{apo}}$  with LeuT (PDB id. 3F3A) with inset showing bound *n*-octyl- $\beta$ -D-glucopyranoside ( $\beta$ -OG) and L-tryptophan in LeuT and PEG in  $dDAT_{\text{apo}}$  in the extracellular vestibule. **c**, Overlay of  $dDAT_{\text{apo}}$  with hSERT (PDB id. 5I73) with inset showing (S)-citalopram in hSERT and PEG in  $dDAT_{\text{apo}}$  in the extracellular vestibule.

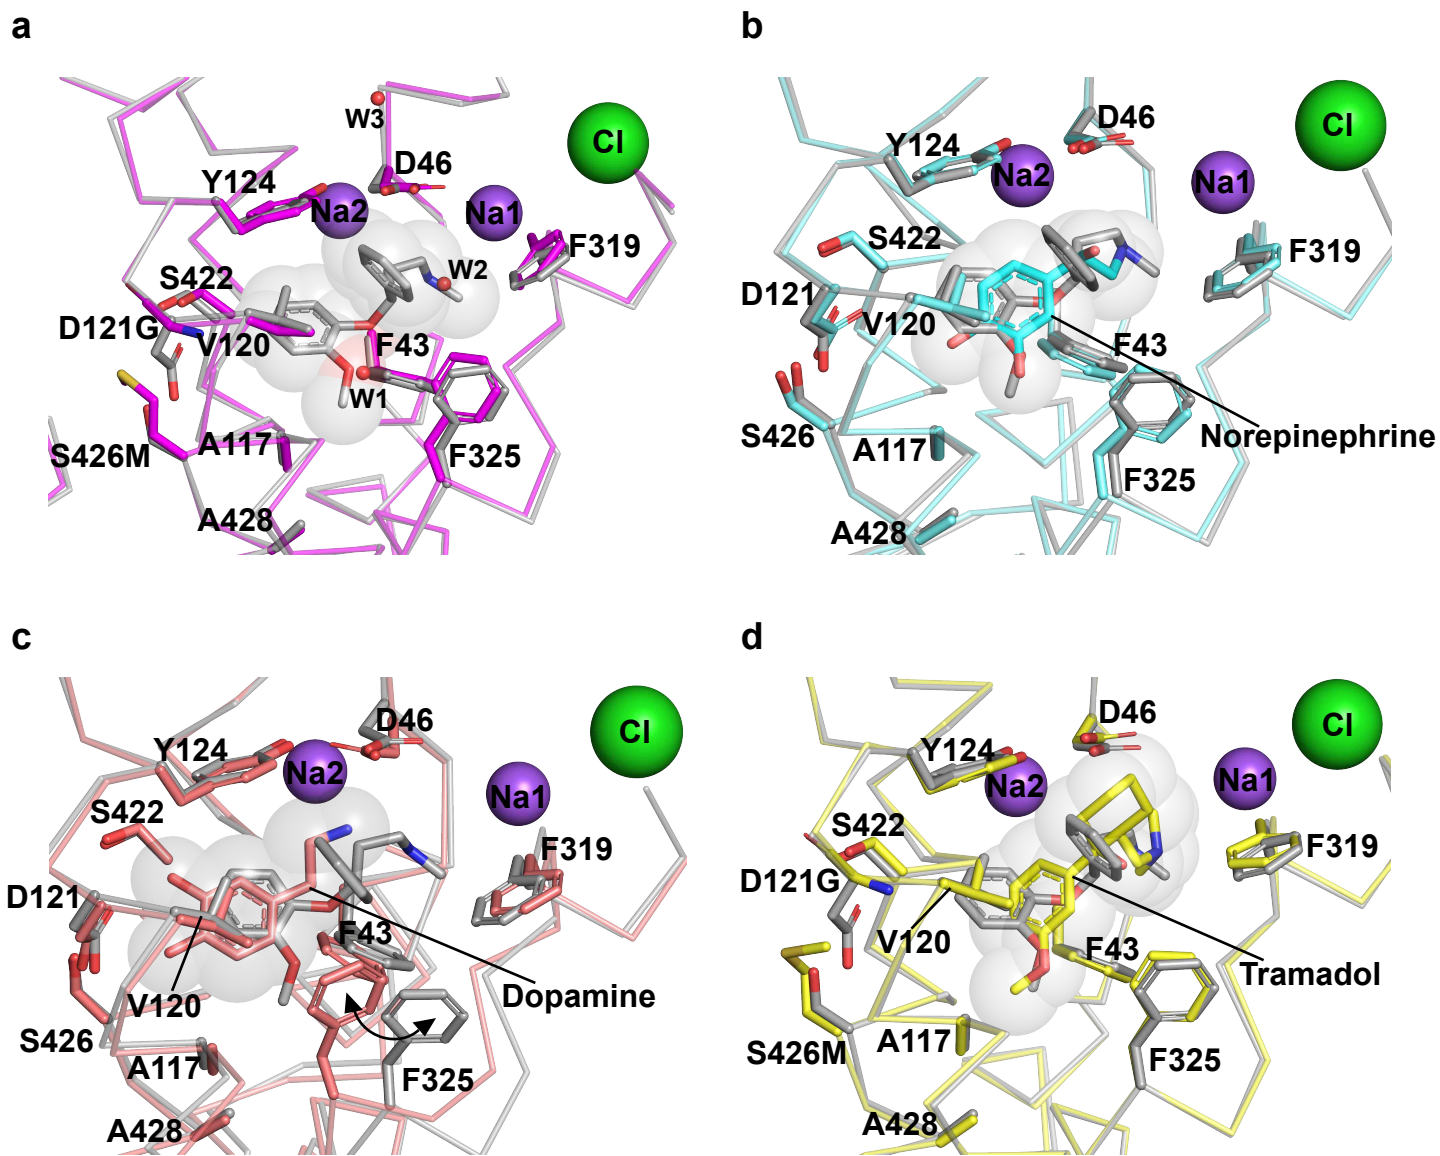

**Supplementary Fig. 4.** **a**, Overlay of nisoxetine bound dDAT (gray) (4XNU) with substrate-free conformation of dDAT<sub>subB</sub> to highlight differences in the binding pocket. Similar structural comparisons with **b**, L-norepinephrine bound dDAT<sub>mfc</sub>, **c**, dopamine bound dDAT<sub>mfc</sub>, **d**, tramadol bound dDAT<sub>NET</sub> display residues that interact with the inhibitors in the primary binding site and shifts in their positions.

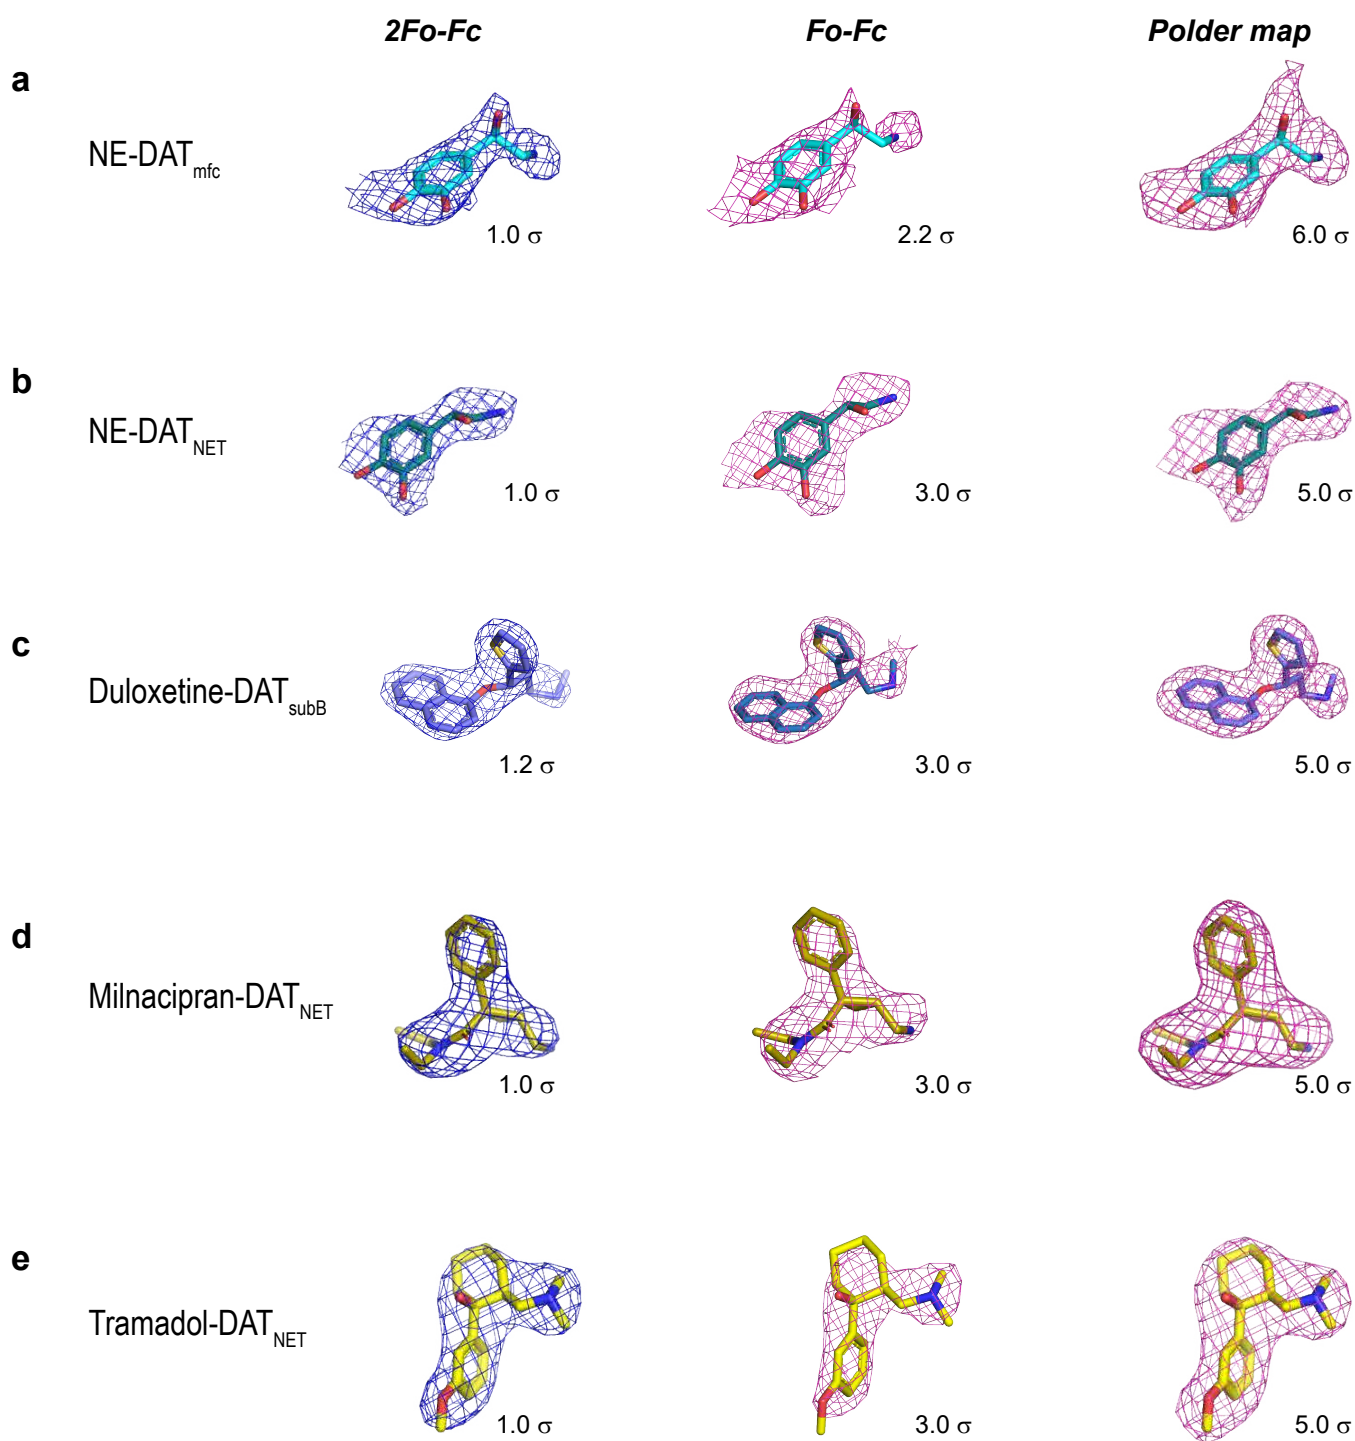

**Supplementary Fig. 5.** Experimental electron densities of substrate and inhibitors bound in the binding pocket of dDAT structures in this study. Column 1 represents *2Fo-Fc* maps (blue), column 2 represents *Fo-Fc* omit maps (magenta) and column 3 represents Polder maps (magenta) for **a**, NE bound dDAT<sub>mfc</sub> **b**, NE bound dDAT<sub>NET</sub> **c**, duloxetine bound dDAT<sub>subB</sub> **d**, milnacipran bound dDAT<sub>NET</sub> **e**, tramadol bound dDAT<sub>NET</sub>

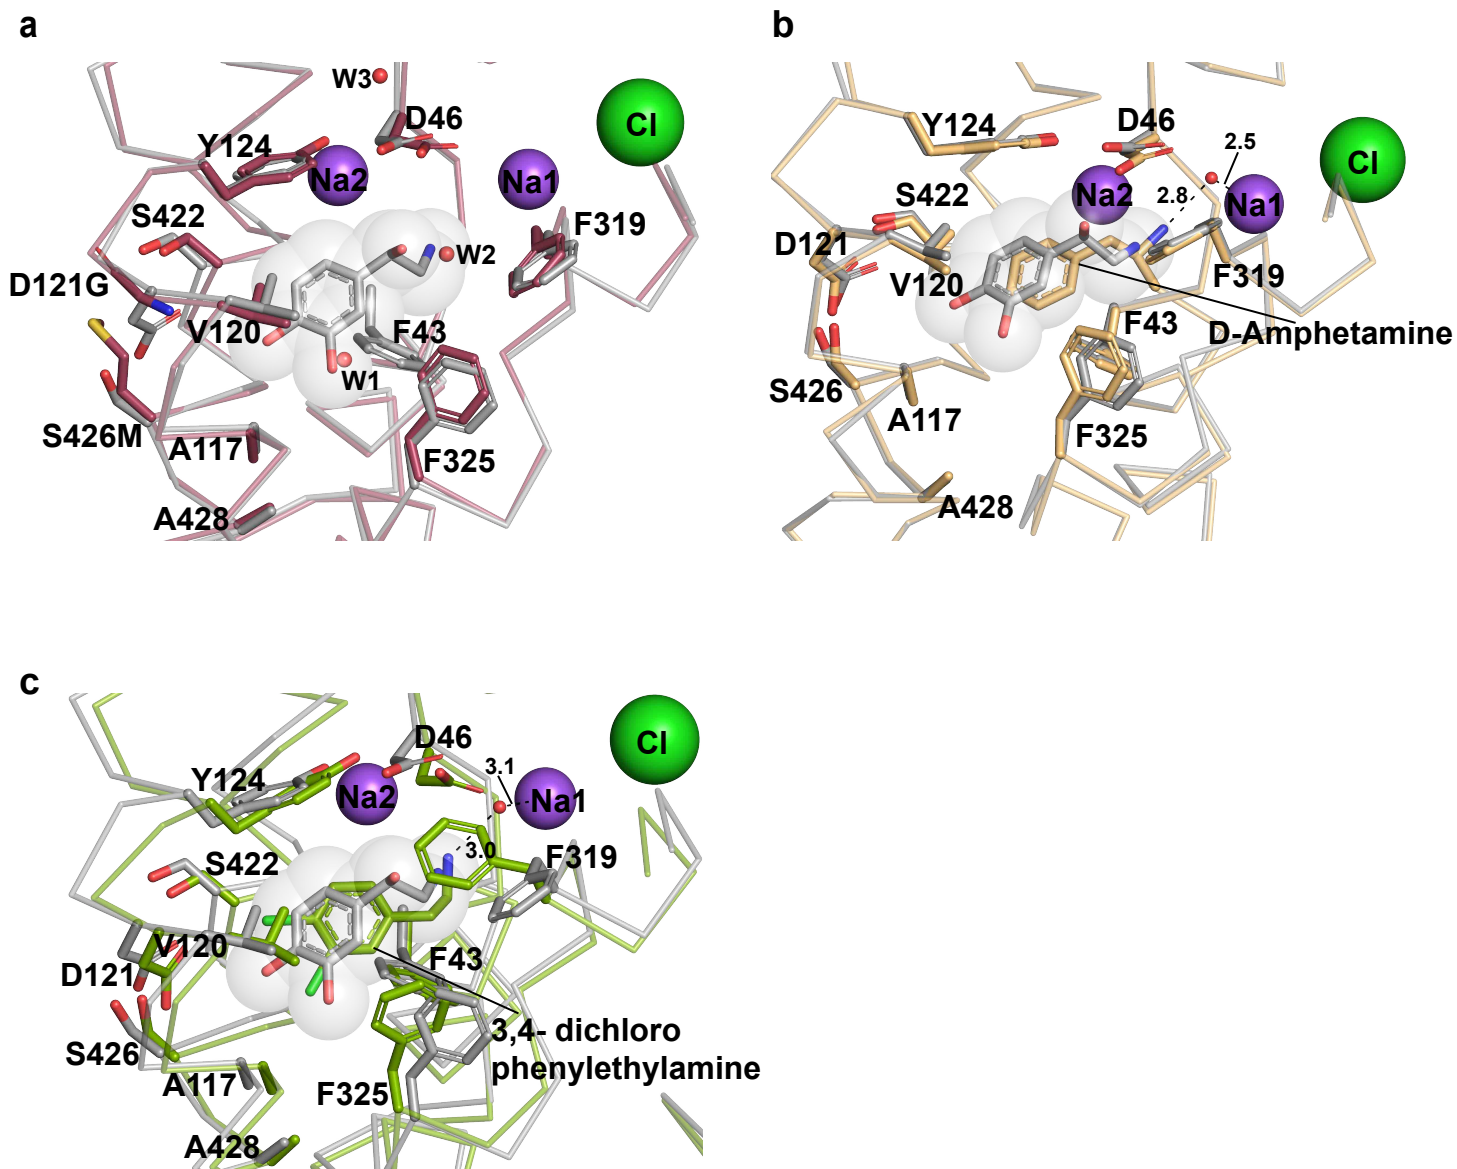

**Supplementary Fig. 6.** Structural comparisons between NE bound dDAT<sub>mfc</sub> ( gray) with **a**, substrate free state of dDAT, **b**, D-amphetamine bound dDAT<sub>mfc</sub> (PDB id 4XP9 ), **c**, 3,4 dichlorophenethylamine bound dDAT<sub>mfc</sub> (PDB id 4XPA).

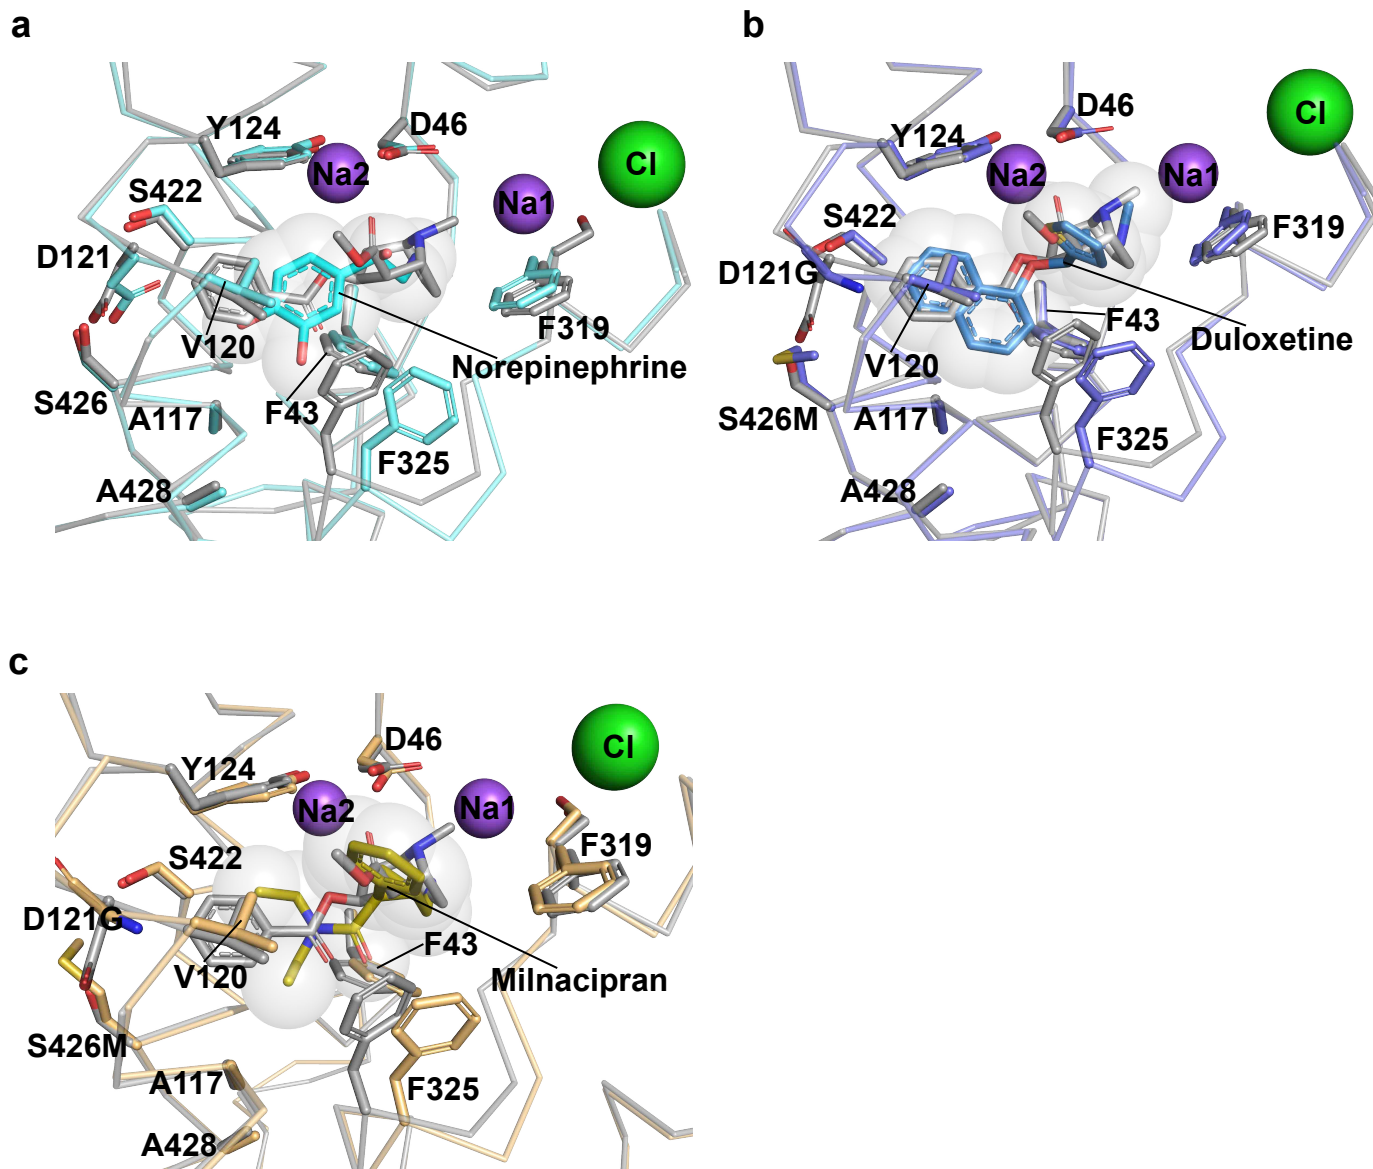

**Supplementary Fig. 7.** Structural overlays between cocaine bound dDAT<sub>mfc</sub> (gray) (PDB id. 4XP4) with **a**, NE bound dDAT<sub>mfc</sub>, **b**, duloxetine bound dDAT<sub>subB</sub>, **c**, milnacipran bound dDAT<sub>NET</sub> to display changes in residue positions within the primary binding site.



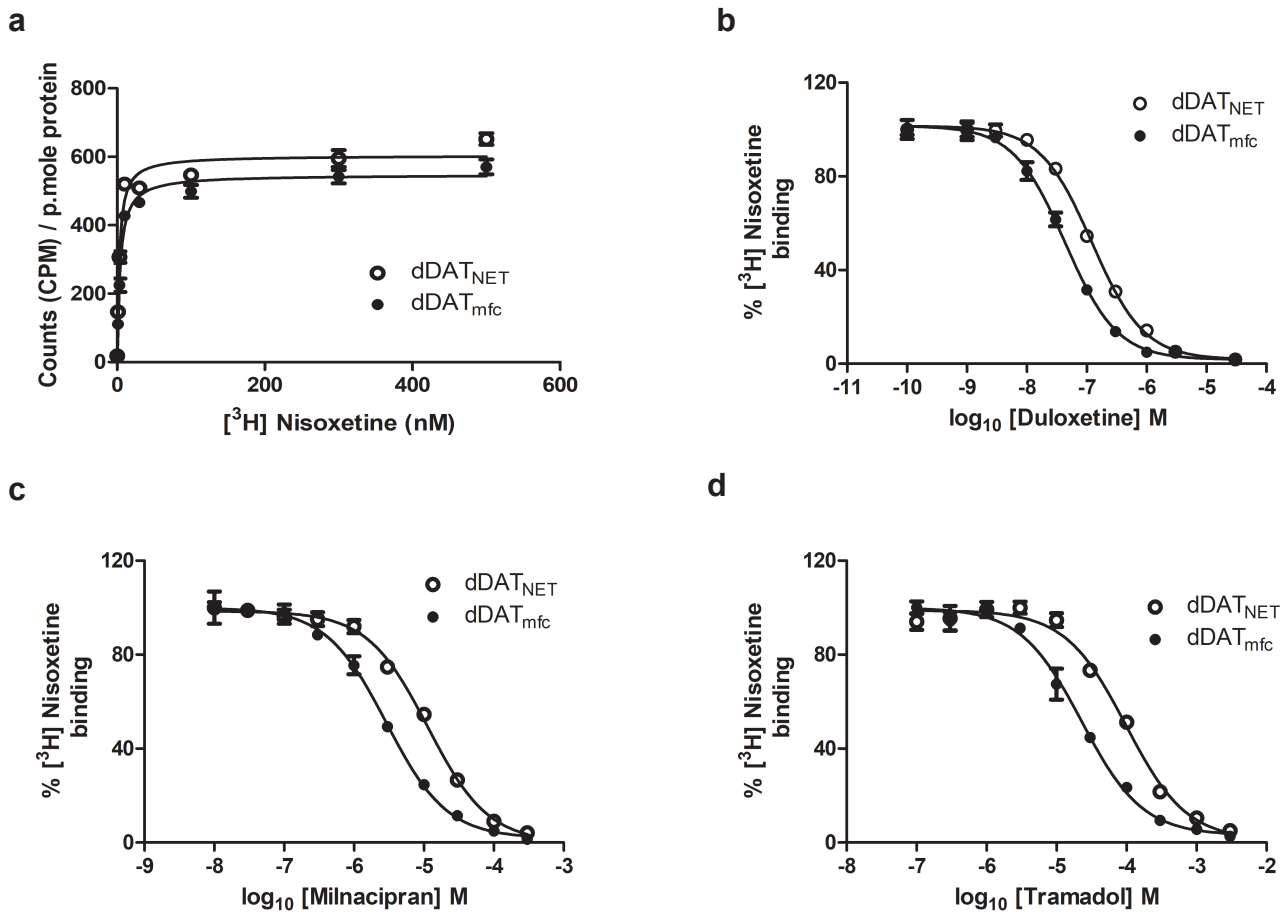

| NET inhibitor | Binding $K_i$ with dDAT <sub>NET</sub> | Binding $K_i$ with dDAT <sub>mfc</sub> |
|---------------|----------------------------------------|----------------------------------------|
| Duloxetine    | $6.52 \pm 0.52$ nM                     | $3.18 \pm 0.31$ nM                     |
| Milnacipran   | $605.18 \pm 25.28$ nM                  | $214.8 \pm 13.82$ nM                   |
| Tramadol      | $5.31 \pm 0.45$ $\mu$ M                | $1.89 \pm 0.16$ $\mu$ M                |

**Supplementary Fig. 8.** a, Binding curves of [<sup>3</sup>H]nisoxetine with dDAT<sub>mfc</sub> and dDAT<sub>NET</sub> containing mutations in primary binding site D121G and S426M. The plot is an average of 9 measurements with error bars representing s.e.m.  $K_d$  values of  $3.82 \pm 0.39$  nM and  $2.79 \pm 0.27$  nM were measured for dDAT<sub>mfc</sub> and dDAT<sub>NET</sub> respectively. Competitive inhibition of [<sup>3</sup>H]nisoxetine binding with increasing concentrations of b, duloxetine, c, milnacipran, d, tramadol performed for dDAT<sub>mfc</sub> (solid circles) and dDAT<sub>NET</sub> (open circles). All plots are an average of 9 measurements each with error bars representing s.e.m.  $K_i$  values reported in the table below were calculated from estimated  $IC_{50}$  values of each inhibition curve and  $K_d$  values estimated from nisoxetine binding using the Cheng-Prusoff equation. Each plot is an average of  $n = 9$  measurements obtained over 3 independent experiments with error bars representing s.e.m. Source data are provided as a Source Data file.

**Supplementary Table 1. Data collection and refinement statistics**

| Parameter                                                                      | Substrate-free<br>dDAT <sub>subB</sub>          | NE-dDAT <sub>mfc</sub>                          | NE-dDAT <sub>NET</sub>                          | S-duloxetine<br>dDAT <sub>subB</sub>            | Milnacipran<br>dDAT <sub>NET</sub>              | Tramadol<br>dDAT <sub>NET</sub>                 |
|--------------------------------------------------------------------------------|-------------------------------------------------|-------------------------------------------------|-------------------------------------------------|-------------------------------------------------|-------------------------------------------------|-------------------------------------------------|
| Source                                                                         | ESRF-ID29                                       | ElettraXRD2                                     | APS-24IDC                                       | ElettraXRD2                                     | APS-24IDC                                       | SLS-PX1                                         |
| Wavelength                                                                     | 0.968                                           | 0.979                                           | 0.979                                           | 0.979                                           | 0.979                                           | 1.000                                           |
| Space group                                                                    | <i>P2<sub>1</sub>2<sub>1</sub>2<sub>1</sub></i> | <i>P2<sub>1</sub>2<sub>1</sub>2<sub>1</sub></i> | <i>P2<sub>1</sub>2<sub>1</sub>2<sub>1</sub></i> | <i>P2<sub>1</sub>2<sub>1</sub>2<sub>1</sub></i> | <i>P2<sub>1</sub>2<sub>1</sub>2<sub>1</sub></i> | <i>P2<sub>1</sub>2<sub>1</sub>2<sub>1</sub></i> |
| Cell dimensions<br><i>a, b, c</i> (Å);<br>$\alpha = \beta = \gamma = 90^\circ$ | 97.7, 133.3,<br>162.0                           | 96.8, 141.2,<br>167.6                           | 97.1, 142.5,<br>168.0                           | 97.3, 140.6,<br>167.8                           | 96.5, 140.9,<br>167.3                           | 97.0, 140.9,<br>167.8                           |
| Resolution (Å), (*)                                                            | 50.0-3.3<br>(3.5-3.3)                           | 50.0-2.8<br>(2.97-2.8)                          | 50.0-2.88<br>(3.05-2.88)                        | 50.0-3.0<br>(3.18-3.0)                          | 50.0-3.11<br>(3.29-3.11)                        | 50.0-3.25<br>(3.45-3.25)                        |
| Total Observations                                                             | 180963<br>(27837)                               | 352419<br>(55239)                               | 358042<br>(55889)                               | 338525<br>(54597)                               | 228053<br>(37703)                               | 193872<br>(32191)                               |
| Unique reflections                                                             | 32633<br>(5148)                                 | 109219<br>(17635)                               | 53971<br>(8591)                                 | 88712<br>(14205)                                | 42395<br>(6747)                                 | 64838<br>(10759)                                |
| Multiplicity                                                                   | 5.5 (5.4)                                       | 3.22 (3.13)                                     | 6.6 (6.5)                                       | 3.81(3.84)                                      | 5.4(5.6)                                        | 3.0 (3.0)                                       |
| Completion (%)                                                                 | 99.7(99.0)                                      | 99.5 (98.9)                                     | 99.9 (99.9)                                     | 99.6 (99.0)                                     | 99.6(99.3)                                      | 93 (95.8)                                       |
| <i>I</i> / $\sigma$ <i>I</i>                                                   | 10.6(0.94)                                      | 11.4 (1.1)                                      | 13.4(1.0)                                       | 11.3 (1.2)                                      | 7.64(1.0)                                       | 8.39 (1.0)                                      |
| CC <sub>1/2</sub> (%)                                                          | 99.9(60.9)                                      | 99.8 (53.6)                                     | 99.8 (43.3)                                     | 99.8 (49.3)                                     | 99.7 (47.5)                                     | 99.9 (84.1)                                     |
| R <sub>meas</sub> (%)                                                          | 11.6 (148.9)                                    | 10.3 (119.0)                                    | 10.2 (206.6)                                    | 10.7 (116.2)                                    | 17.4 (135.4)                                    | 15.1 (132.3)                                    |
| <i>Refinement Statistics</i>                                                   |                                                 |                                                 |                                                 |                                                 |                                                 |                                                 |
| Resolution                                                                     | 50.0-3.3                                        | 50.0-2.8                                        | 50.0-2.88                                       | 50.0-3.0                                        | 50.0-3.1                                        | 50.0-3.25                                       |
| Reflections <sup>#</sup>                                                       | 32557<br>(3144)                                 | 57114<br>(5587)                                 | 53940<br>(5335)                                 | 46691<br>(4542)                                 | 42341<br>(4157)                                 | 35194<br>(3543)                                 |
| R <sub>work</sub> (%)                                                          | 24.3 (37.0)                                     | 21.2 (34.3)                                     | 21.2 (34.0)                                     | 21.5 (30.9)                                     | 22.3 (32.3)                                     | 24.2 (32.2)                                     |
| R <sub>free</sub> (%)                                                          | 27.6 (40.5)                                     | 24.8 (39.0)                                     | 24.7 (36.4)                                     | 24.4 (32.5)                                     | 26.5 (36.8)                                     | 27.8 (37.3)                                     |
| No. of non-H atoms                                                             | 7508                                            | 7780                                            | 7654                                            | 7634                                            | 7670                                            | 7615                                            |
| Protein                                                                        | 7430                                            | 7538                                            | 7507                                            | 7490                                            | 7504                                            | 7455                                            |
| Substrate/Inhibitor                                                            | -                                               | 12                                              | 12                                              | 21                                              | 18                                              | 19                                              |
| Ions/Lipid/Detergent                                                           | 70                                              | 131                                             | 99                                              | 99                                              | 128                                             | 122                                             |
| water                                                                          | 8                                               | 99                                              | 36                                              | 24                                              | 20                                              | 19                                              |
| Average B-factor                                                               | 112.9                                           | 64.2                                            | 89.92                                           | 78.3                                            | 84.6                                            | 89.4                                            |
| Protein                                                                        | 112.9                                           | 64.05                                           | 89.73                                           | 78.2                                            | 84.4                                            | 89.1                                            |
| Substrate/Inhibitor                                                            | -                                               | 87.8                                            | 102                                             | 71.5                                            | 79.7                                            | 88.0                                            |
| Detergent/Lipid/PEG                                                            | 117.0                                           | 77.4                                            | 101                                             | 89                                              | 97                                              | 92.5                                            |
| water                                                                          | 92.3                                            | 60.1                                            | 92.7                                            | 69.9                                            | 75.8                                            | 80.1                                            |
| RMS bond lengths<br>(Å)                                                        | 0.004                                           | 0.006                                           | 0.005                                           | 0.006                                           | 0.01                                            | 0.005                                           |
| RMS bond angles<br>(°)                                                         | 1.01                                            | 1.12                                            | 1.00                                            | 1.1                                             | 1.40                                            | 1.17                                            |
| <i>Ramachandran statistics</i>                                                 |                                                 |                                                 |                                                 |                                                 |                                                 |                                                 |
| Favoured                                                                       | 92.3                                            | 94.60                                           | 94.70                                           | 95.8                                            | 94.8                                            | 95.1                                            |
| Allowed                                                                        | 7.7                                             | 5.4                                             | 5.3                                             | 4.2                                             | 5.2                                             | 4.9                                             |
| Disallowed                                                                     | 0                                               | 0                                               | 0                                               | 0                                               | 0                                               | 0                                               |

\* Values in parentheses represent highest-resolution shell.

# Reflections employed in structure refinement.

## Supplementary Table 2.

### a Uptake Inhibition

|                    | Duloxetine                                      | Milnacipran                                     | Tramadol                                                   |
|--------------------|-------------------------------------------------|-------------------------------------------------|------------------------------------------------------------|
| hNET               | $K_i = 81 \pm 19 \text{ nM}^1$                  | $K_i = 52 \pm 9 \text{ nM}^1$                   | $K_i = 19.7 \mu\text{M}^2$                                 |
| dDAT <sub>fc</sub> | $K_i = 69.4 \pm 2.9 \text{ nM}$<br>(This study) | $K_i = 1.5 \pm 0.1 \mu\text{M}$<br>(This study) | $K_i = 15.9 \pm 1.8 \mu\text{M}$<br>(This study)           |
| hDAT               | $K_i = 370 \text{ nM}^3$                        | $K_i = >100,000 \text{ nM}^4$                   | $\text{IC}_{50} = 100 \mu\text{M}^5$<br>$K_i = \text{N/D}$ |

### b Binding Inhibition ( $K_i$ )

|                     | Duloxetine                                                  | Milnacipran                                                       | Tramadol                                                     |
|---------------------|-------------------------------------------------------------|-------------------------------------------------------------------|--------------------------------------------------------------|
| hNET                | $1.17 \pm 0.11 \text{ nM}$ (vs. Nisoxetine) <sup>4</sup>    | $22 \pm 2.58 \text{ nM}$ (vs. Nisoxetine) <sup>4</sup>            | $11.2 \mu\text{M}$ (vs. desipramine) <sup>2</sup>            |
| dDAT <sub>NET</sub> | $6.52 \pm 0.52 \text{ nM}$ (vs. Nisoxetine)<br>(This study) | $605.18 \pm 25.28 \text{ nM}$<br>(vs. Nisoxetine)<br>(This study) | $5.31 \pm 0.45 \mu\text{M}$ (vs. Nisoxetine)<br>(This study) |
| hDAT                | $230 \pm 17 \text{ nM}$<br>(vs. RTI-55) <sup>4</sup>        | $>100,000 \text{ nM}$<br>(vs. RTI-55) <sup>4</sup>                | N/D                                                          |

### c Nisoxetine binding affinity

|                          | dDAT <sub>NET</sub>             | dDAT <sub>mfc</sub>             | hNET    | hDAT |
|--------------------------|---------------------------------|---------------------------------|---------|------|
| Nisoxetine $K_d$<br>(nM) | $2.79 \pm 0.27$<br>(This study) | $3.82 \pm 0.39$<br>(This study) | $5.1^6$ | N/D  |

### Supplementary References

1. Sorensen, L. et al. Interaction of antidepressants with the serotonin and norepinephrine transporters: mutational studies of the S1 substrate binding pocket. *J Biol Chem* **287**, 43694-707 (2012).
2. Sagata, K. et al. Tramadol inhibits norepinephrine transporter function at desipramine-binding sites in cultured bovine adrenal medullary cells. *Anesth Analg* **94**, 901-6, (2002).
3. Bymaster, F.P. et al. Duloxetine (Cymbalta), a dual inhibitor of serotonin and norepinephrine reuptake. *Bioorg Med Chem Lett* **13**, 4477-80 (2003).
4. Vaishnavi, S.N. et al. Milnacipran: a comparative analysis of human monoamine uptake and transporter binding affinity. *Biol Psychiatry* **55**, 320-2 (2004).
5. Rickli, A., Liakoni, E., Hoener, M.C. & Liechti, M.E. Opioid-induced inhibition of the human 5-HT and noradrenaline transporters in vitro: link to clinical reports of serotonin syndrome. *Br J Pharmacol* **175**, 532-543 (2018).
6. Paczkowski, F.A., Sharpe, I.A., Dutertre, S. & Lewis, R.J.  $\chi$ -Conotoxin and tricyclic antidepressant interactions at the norepinephrine transporter define a new transporter model. *J Biol Chem* **282**, 17837-44 (2007).

**Supplementary Table 3**

| <b>Primer</b> | <b>Sequence</b>                                                       |
|---------------|-----------------------------------------------------------------------|
| A117S_FP      | 5'GTGGTGCTGATATCCTTCTATGTGGACTT3'                                     |
| D121G_FP      | 5'GCCTTCTATGTGGGCTTCTATTACAATG3'                                      |
| S426M_FP      | 5'GTTTCGTTTGGTGGTATGGAGGCTATAATC3'                                    |
| A428S_RP      | 5'AGCTGTGATTATAGACTCTGAACCACC3'                                       |
| F471L_FP      | 5'GGTGGCTTCTATTTCTTGCATCTGCTGGATCGT3'                                 |
| 9D5Hc_RP      | 5'GACAAGCTTTCAGTGATGGTGGTGGTGGTGGGCGGC<br>CGCTGATTGGAAGTACAGGTTTTTC3' |
| 9D5Hc_FP      | 5'GCGGAATTCGCCACCATGGTAAGCGCTATTGTTTTATATG3'                          |
| 9D5Lc_RP      | 5'CTGCTAGCCTAGCATTTCGTTGCGGTAAAAC3'                                   |
| 9D5Lc_RP      | 5'GATCTCGAGGCCACCATGGTAAGCGCTATTGTTTTATATGTG3'                        |
